# Supplementary material for: Conversion and Obsessive–Phobic Symptoms Predict IL-33 and IL-28A Levels in Individuals Diagnosed with COVID-19
Source: MDPI journal article supplement (doi:10.3390/brainsci13091271), 2023-08-31
Supplement: s1 [file s1]

**Table S5.** Correlations between ADS and interleukins values in persons diagnosed with COVID-19 (N=52).

| ADS |                     | IL-10 | IL-28A | IL-33 |
|-----|---------------------|-------|--------|-------|
| BS  | Pearson Correlation | .001  | -.271  | .274  |
|     | Sig. ( 2-tailed)    | .993  | .057   | .054  |
| VS  | Pearson Correlation | .101  | -.100  | .061  |
|     | Sig. (2-tailed)     | .487  | .486   | .673  |
| CS  | Pearson Correlation | .057  | -.032  | .006  |
|     | Sig. (2-tailed)     | .692  | .824   | .966  |
| OPS | Pearson Correlation | -.164 | -.239  | .289* |
|     | Sig. (2-tailed)     | .270  | .102   | .046  |
| DS  | Pearson Correlation | -.067 | -.218  | .120  |
|     | Sig. (2-tailed)     | .648  | .128   | .408  |

\* Correlation is significant at the 0.05 level (2-tailed).
