# Supplementary material for: Conversion and Obsessive–Phobic Symptoms Predict IL-33 and IL-28A Levels in Individuals Diagnosed with COVID-19
Source: MDPI journal article supplement (doi:10.3390/brainsci13091271), 2023-08-31
Supplement: s1 [file s1]

**Table S3.** Differences by gender in ADS between persons diagnosed with COVID-19 (Independent-Samples T-Test) (N=52).

| Scales | Groups | N  | Mean  | SD    | t     | df | p    |
|--------|--------|----|-------|-------|-------|----|------|
| BS     | Women  | 25 | 3.28  | 2.46  | .553  | 48 | .291 |
|        | Men    | 25 | 2.88  | 2.65  |       |    |      |
| VS     | Women  | 26 | 6.31  | 3.51  | 2.315 | 49 | .012 |
|        | Men    | 25 | 4.20  | 2.96  |       |    |      |
| CS     | Women  | 26 | 1.15  | 1.49  | .721  | 49 | .237 |
|        | Men    | 25 | .88   | 1.20  |       |    |      |
| OPS    | Women  | 24 | 3.54  | 3.02  | .274  | 46 | .393 |
|        | Men    | 24 | 3.29  | 3.29  |       |    |      |
| DS     | Women  | 25 | 1.68  | 1.97  | .000  | 48 | .500 |
|        | Men    | 25 | 1.68  | 2.39  |       |    |      |
| ADS    | Women  | 24 | 15.79 | 10.96 | 1.117 | 46 | .135 |
|        | Men    | 24 | 12.33 | 10.49 |       |    |      |
