# Supplementary material for: Conversion and Obsessive–Phobic Symptoms Predict IL-33 and IL-28A Levels in Individuals Diagnosed with COVID-19
Source: MDPI journal article supplement (doi:10.3390/brainsci13091271), 2023-08-31
Supplement: s1 [file s1]

**Table S2.** Internal consistency of ADS.

| <b>Subscales</b>          | <b>Cronbach's Alpha</b> | <b>No. of items</b> |
|---------------------------|-------------------------|---------------------|
| Basic syndrome            | 0.770                   | 9                   |
| Vegetative syndrome       | 0.781                   | 16                  |
| Conversion syndrome       | 0.636                   | 7                   |
| Obsessive-phobic syndrome | 0.830                   | 13                  |
| Depressive syndrome       | 0.825                   | 8                   |
| Anxiety-Depressive Scale  | 0.934                   | 65                  |
