# Supplementary material for: Conversion and Obsessive–Phobic Symptoms Predict IL-33 and IL-28A Levels in Individuals Diagnosed with COVID-19
Source: MDPI journal article supplement (doi:10.3390/brainsci13091271), 2023-08-31
Supplement: s1 [file s1]

**Table S4.** Measures of central tendency and dispersion of interleukins values.

|                    | IL-10/ pg/ml | IL-28A/ ng/l | IL-33/ ng/l |
|--------------------|--------------|--------------|-------------|
| Mean               | 339.687      | 61.40852     | 165.05279   |
| Std. Error of Mean | 22.3888      | 13.043588    | 35.024510   |
| Std. Deviation     | 159.8878     | 94.058650    | 252.565337  |
