# Supplementary material for: Conversion and Obsessive–Phobic Symptoms Predict IL-33 and IL-28A Levels in Individuals Diagnosed with COVID-19
Source: MDPI journal article supplement (doi:10.3390/brainsci13091271), 2023-08-31
Supplement: s1 [file s1]

**Table S1.** Distribution of raw data by ADS.

|          | BS    | VS    | CS    | OPS   | DS    |
|----------|-------|-------|-------|-------|-------|
| Valid    | 50    | 51    | 51    | 48    | 50    |
| Missing  | 2     | 1     | 1     | 4     | 2     |
| Mean     | 3.08  | 5.27  | 1.02  | 3.42  | 1.68  |
| Median   | 2.00  | 4.00  | .00   | 2.00  | 1.00  |
| Mode     | 1     | 3     | 0     | 1     | 0     |
| S.D.     | 2.54  | 3.39  | 1.35  | 3.13  | 2.17  |
| Skewness | .663  | .704  | 1.541 | .897  | 1.628 |
| Kurtosis | -.547 | -.529 | 2.645 | -.246 | 2.011 |
| Minimum  | 0     | 1     | 0     | 0     | 0     |
| Maximum  | 9     | 14    | 6     | 11    | 8     |

\* Multiple modes exist. The smallest value is shown.

Legend:

Standart Deviation-S.D., Basic syndrome-BS, Vegetative syndrome-VS, Conversion syndrome-CS, Obsessive-phobic syndrome-OPS, Depressive syndrome-DS
