# Supplementary figures and images for: Conversion and Obsessive–Phobic Symptoms Predict IL-33 and IL-28A Levels in Individuals Diagnosed with COVID-19
Source: MDPI journal article supplement (doi:10.3390/brainsci13091271), 2023-08-31

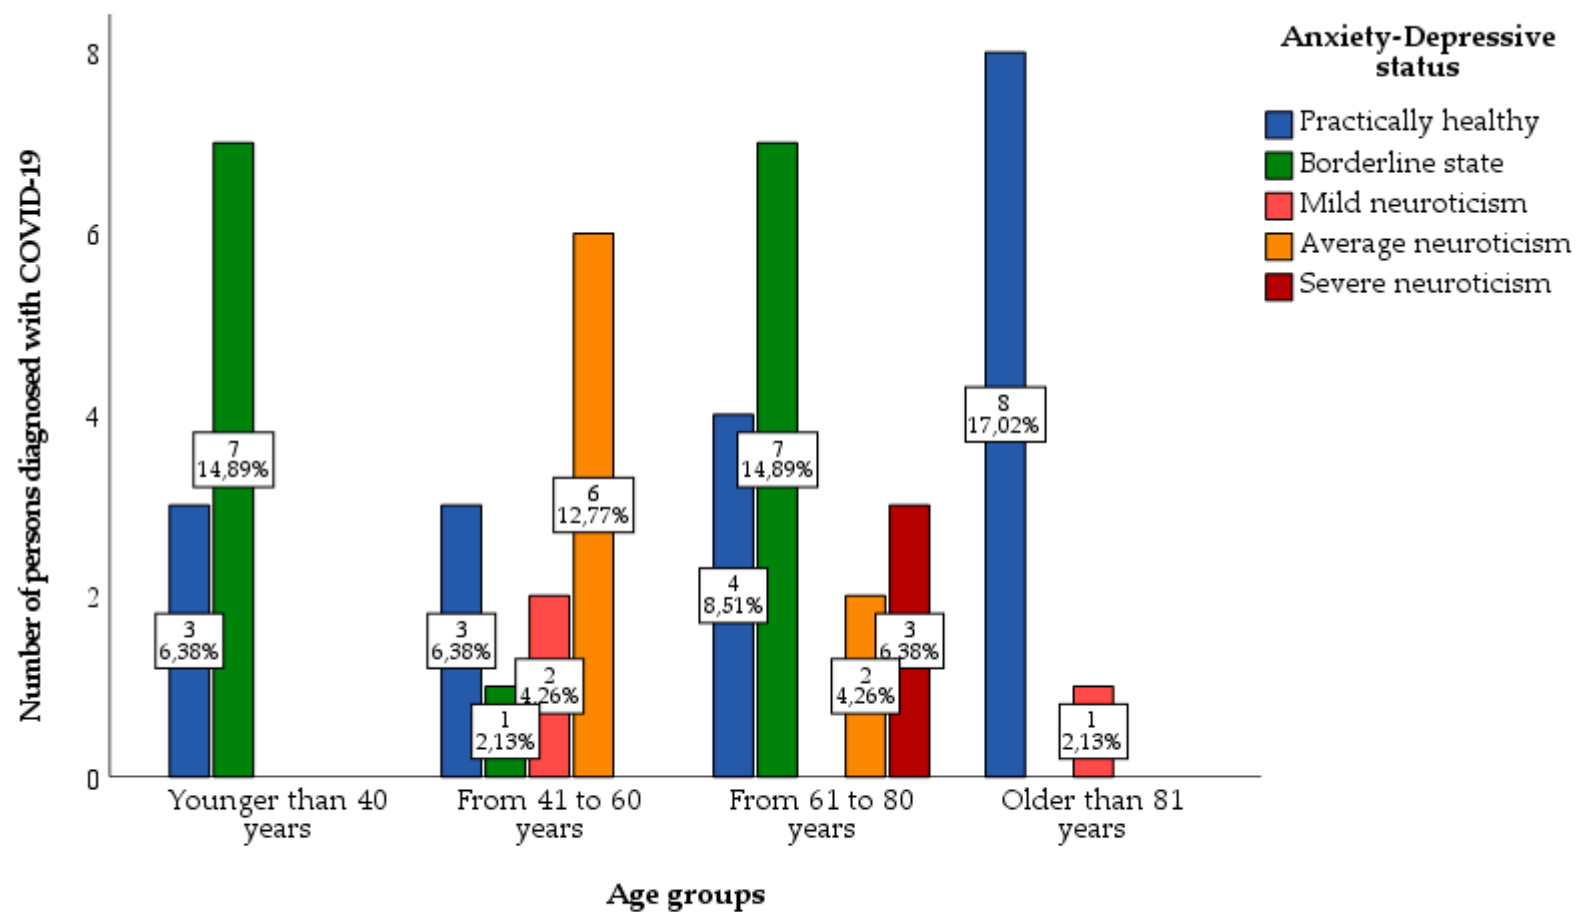

**Figure S2.** Anxiety-Depressive status in persons diagnosed with COVID-19 in different age groups.

Supplement: s1 [file s1]

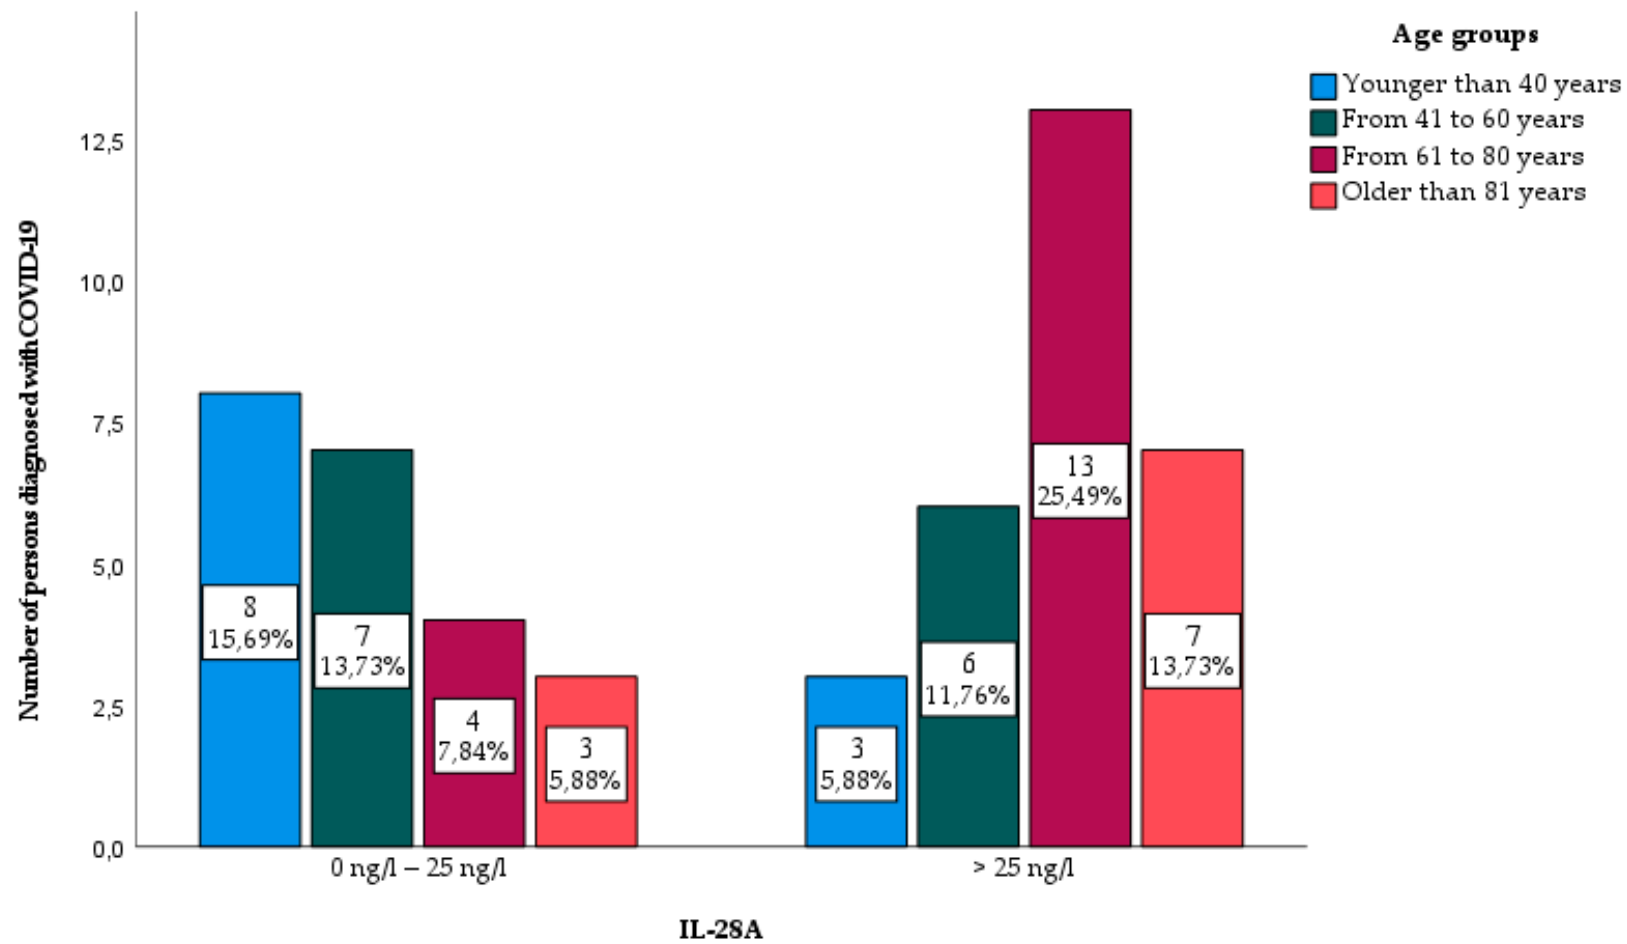

**Figure S4.** Distribution of IL-28A values in different age groups

Supplement: s1 [file s1]

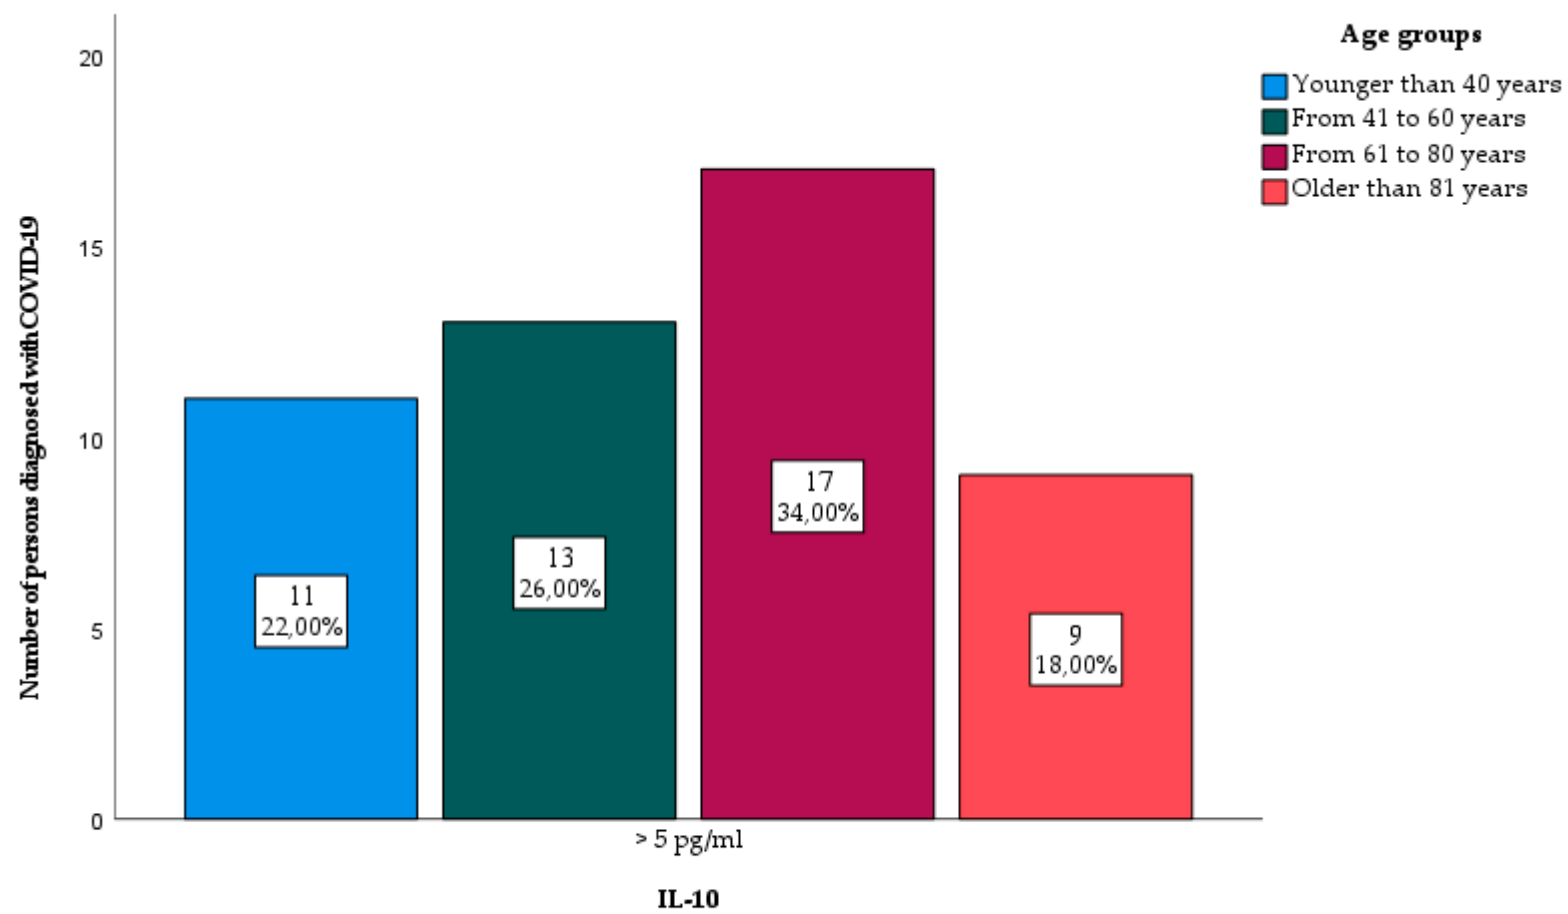

**Figure S3.** Distribution of IL-10 values in different age groups

Supplement: s1 [file s1]

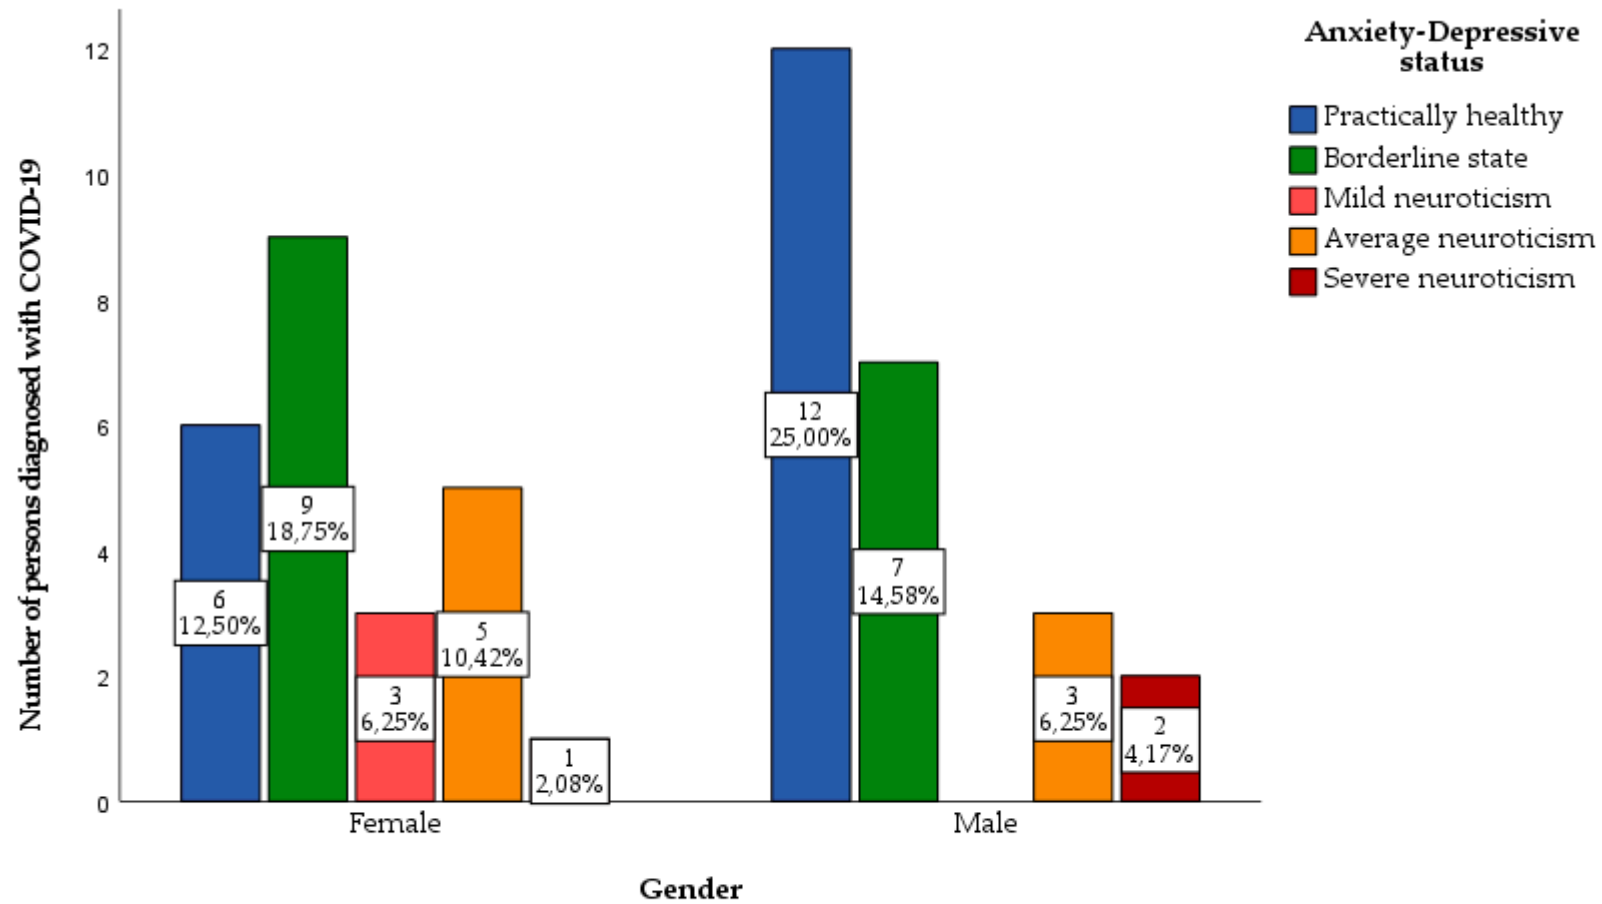

**Figure S1.** Anxiety-Depressive status of persons diagnosed with COVID-19.

Supplement: s1 [file s1]

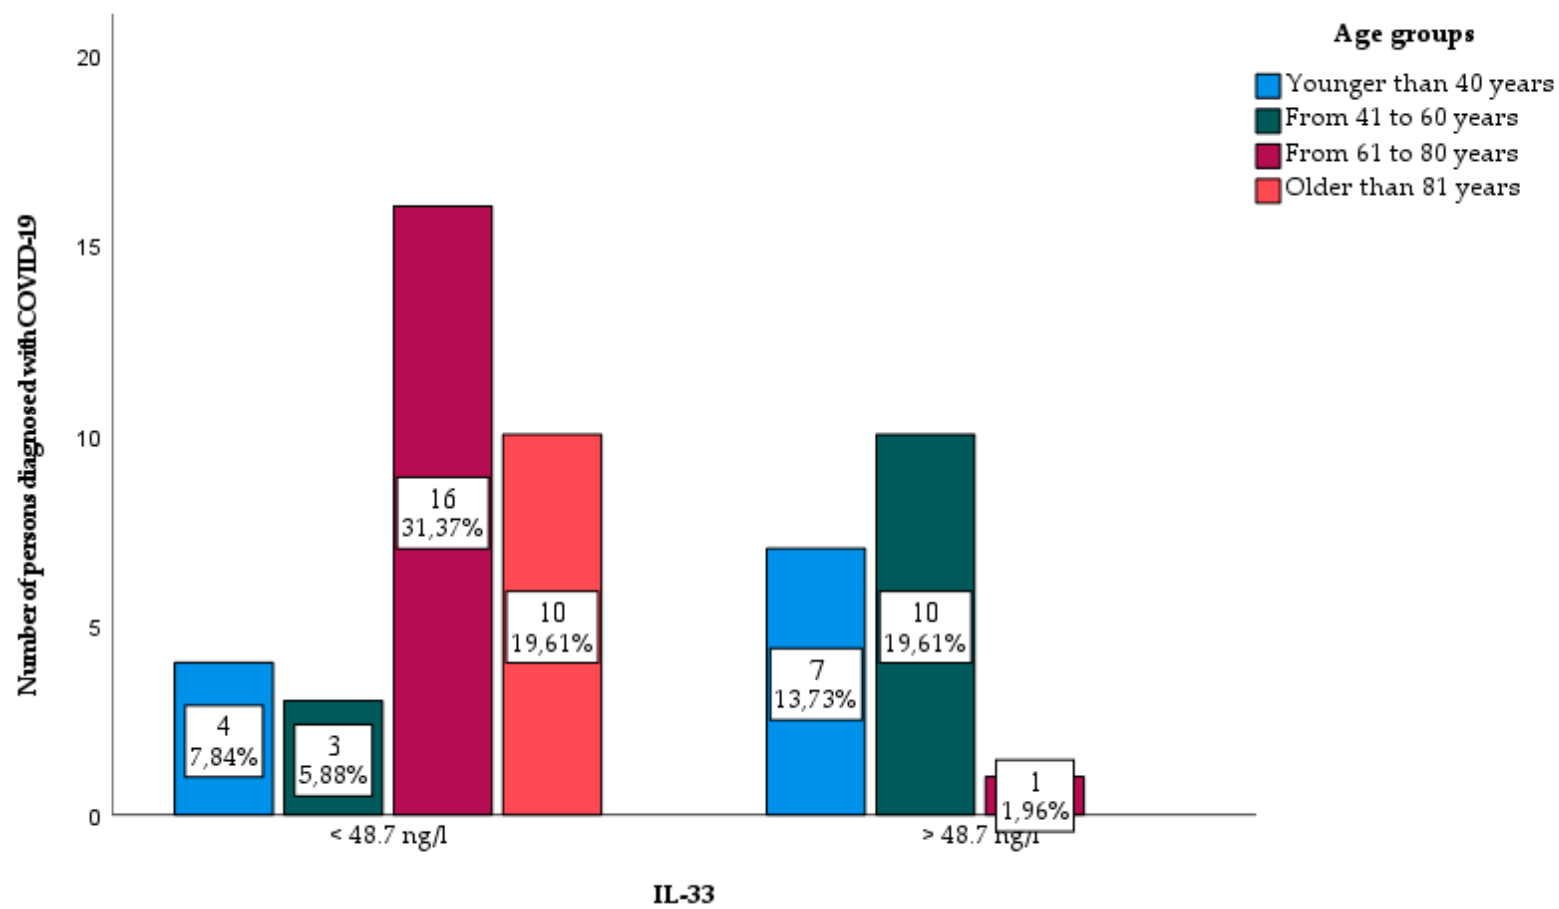

**Figure S5.** Distribution of IL-33 values in different age groups

Supplement: s1 [file s1]
